# Supplementary material for: The Validity and Reliability of the Copenhagen Burnout Inventory for Examination of Burnout among Preschool Teachers in Serbia
Source: MDPI journal article supplement (doi:10.3390/ijerph18136805), 2021-06-24
Supplement: s1 [file s1]

## **Kopenhagen upitnik o sagorevanju na poslu- Srpska verzija**

### **I CBI – Lični faktori sagorevanja**

U ovom delu upitniku nalazi se skup pitanja. Pažljivo pročitajte svako od njih. Zatim odaberite odgovor koji najbolje opisuje kako se osećate, prateći učestalost:

- ☐ Nikad (0% vremena) ☐ Retko (25% vremena) ☐ Ponekad (50% vremena) ☐ Često (75% vremena)  
☐ Uvek (100% vremena)

1. **Koliko često se osećate umorno?**  
☐ Nikad ☐ Retko ☐ Ponekad ☐ Često ☐ Uvek
2. **Koliko često se osećate fizički iscrpljeno?**  
☐ Nikad ☐ Retko ☐ Ponekad ☐ Često ☐ Uvek
3. **Koliko često se osećate emocionalno iscrpljeno?**  
☐ Nikad ☐ Retko ☐ Ponekad ☐ Često ☐ Uvek
4. **Koliko često pomislite „Ne mogu više ovako“?**  
☐ Nikad ☐ Retko ☐ Ponekad ☐ Često ☐ Uvek
5. **Koliko često se osećate istrošeno?**  
☐ Nikad ☐ Retko ☐ Ponekad ☐ Često ☐ Uvek
6. **Koliko često se osećate slabo i podložno bolestima?**  
☐ Nikad ☐ Retko ☐ Ponekad ☐ Često ☐ Uvek

### **II CBI – Sagorevanje povezano sa poslom**

7. **Da li je Vaš posao emocionalno iscrpljujući?**  
☐ Nikad ☐ Retko ☐ Ponekad ☐ Često ☐ Uvek
8. **Da li se osećate iscrpljeno zbog svog posla?**  
☐ Nikad ☐ Retko ☐ Ponekad ☐ Često ☐ Uvek
9. **Da li Vas Vaš posao frustrira?**  
☐ Nikad ☐ Retko ☐ Ponekad ☐ Često ☐ Uvek
10. **Da li se osećate istrošeno na kraju radnog dana?**  
☐ Nikad ☐ Retko ☐ Ponekad ☐ Često ☐ Uvek
11. **Da li se osećate iscrpljeno ujutru pri pomisli na još jedan dan na poslu?**  
☐ Nikad ☐ Retko ☐ Ponekad ☐ Često ☐ Uvek
12. **Da li osećate da Vam je svaki radni sat naporan?**  
☐ Nikad ☐ Retko ☐ Ponekad ☐ Često ☐ Uvek
13. **Da li imate dovoljno vremena za porodicu i prijatelje nakon posla?**  
☐ Nikad ☐ Retko ☐ Ponekad ☐ Često ☐ Uvek

### **III CBI – Sagorevanje povezano sa decom**

**14. Da li smatrate da je teško raditi sa decom?**

☐ Nikad ☐ Retko ☐ Ponekad ☐ Često ☐ Uvek

**15. Da li smatrate da je rad sa decom frustrirajući?**

☐ Nikad ☐ Retko ☐ Ponekad ☐ Često ☐ Uvek

**16. Da li rad sa decom crpi Vašu energiju?**

☐ Nikad ☐ Retko ☐ Ponekad ☐ Često ☐ Uvek

**17. Da li se osećate da više dajete nego što dobijate u radu sa decom?**

☐ Nikad ☐ Retko ☐ Ponekad ☐ Često ☐ Uvek

**18. Da li ste umorni od rada sa decom?**

☐ Nikad ☐ Retko ☐ Ponekad ☐ Često ☐ Uvek

**19. Da li se nekada pitate koliko ćete još biti u stanju da radite sa decom?**

☐ Nikad ☐ Retko ☐ Ponekad ☐ Često ☐ Uvek
